# Supplementary material for: Elevated circulating soluble interleukin-2 receptor in patients with chronic liver diseases is associated with non-classical monocytes
Source: PubMed Central journal article supplement (PMC3434055; doi:10.1186/1471-230x-12-38), 2012-04-24

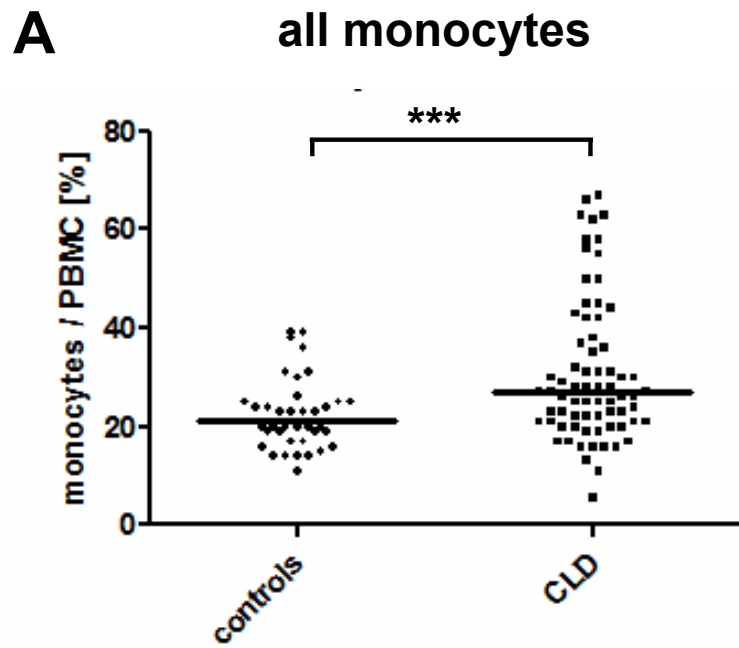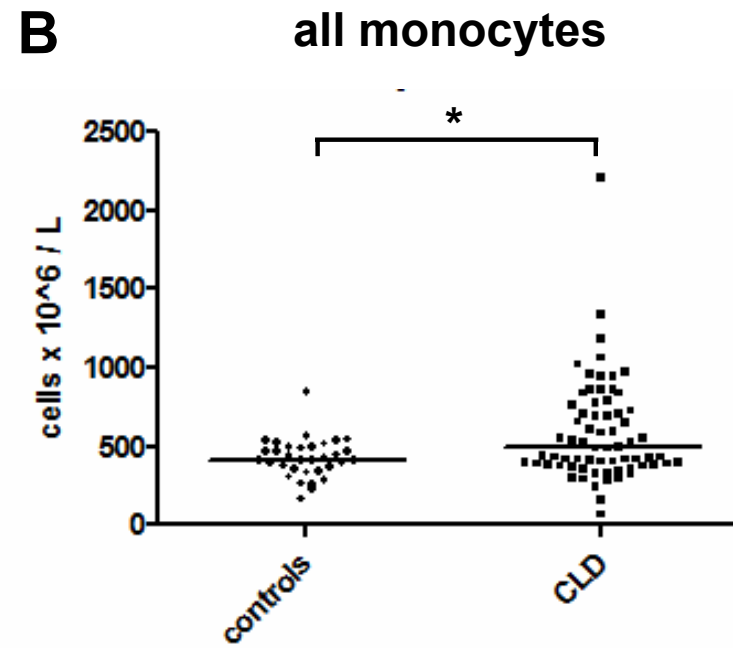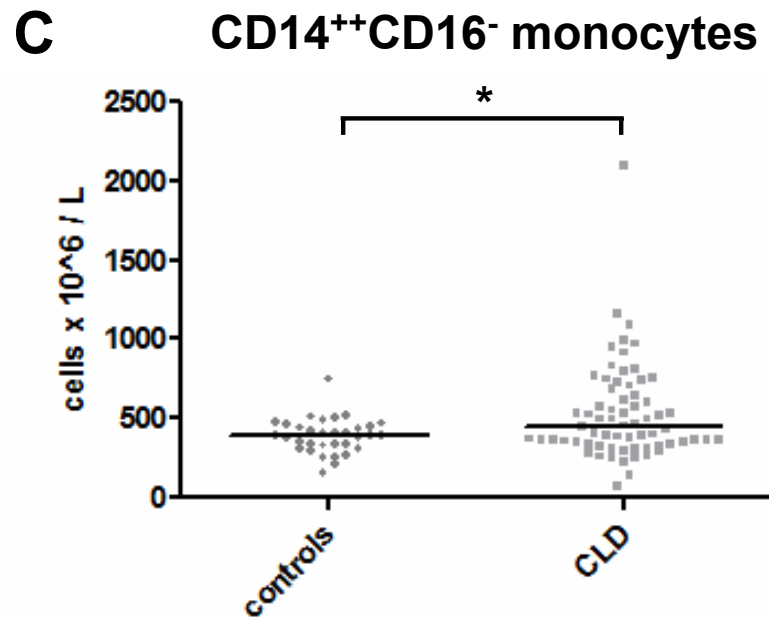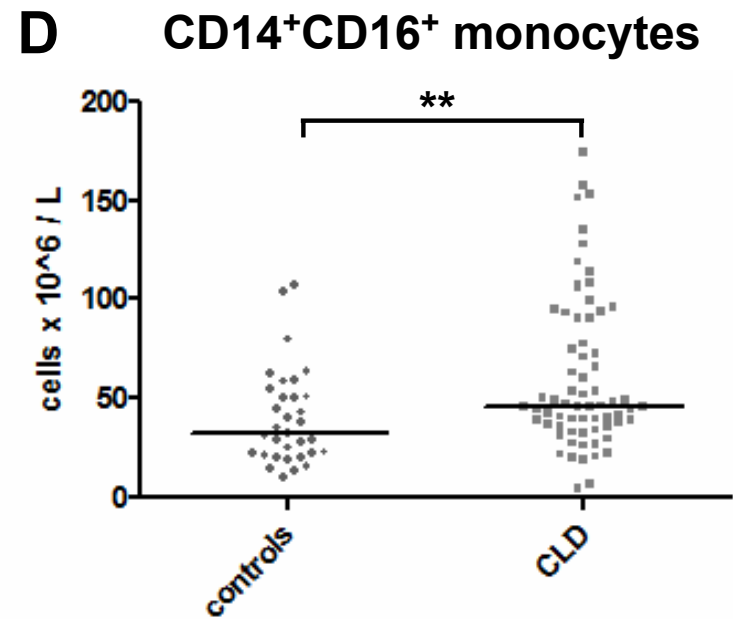

Supplement: 1471-230X-12-38-S1.pdf [file 1471-230X-12-38-S1.pdf]
